# Supplementary material for: Fracture repair requires TrkA signaling by skeletal sensory nerves
Source: JCI journal article supplement (doi:10.1172/jci128428), 2019-10-21
Supplement: sd1 [file 1]

## Supplementary Information

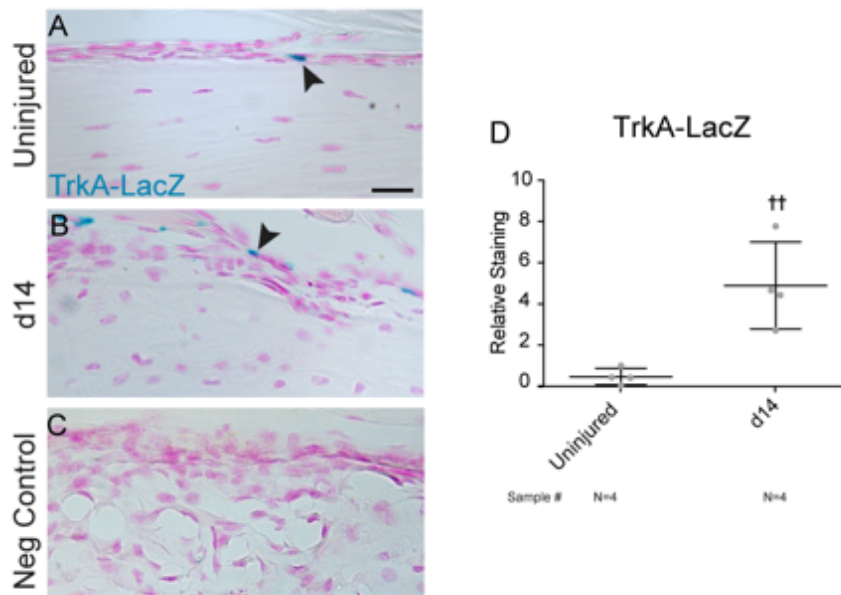

**Supplementary Figure S1. TrkA reporter activity after stress fracture.** (A,B) High magnification images of Xgal stained sections among TrkA-LacZ reporter animals, including (A) uninjured control and (B) callus at d14 post-injury. (C) Negative control confirming absence of staining in a LacZ<sup>-</sup> fracture callus. (D) Quantification of TrkA-LacZ reporter activity, comparing d14 post-fracture to uninjured control. In graphs, each dot represents a single sample, with sample number stated below. Black scale bar: 20  $\mu$ m. ††  $P < 0.01$  in comparison to uninjured control as determined using a two-way Student's *t*-test.

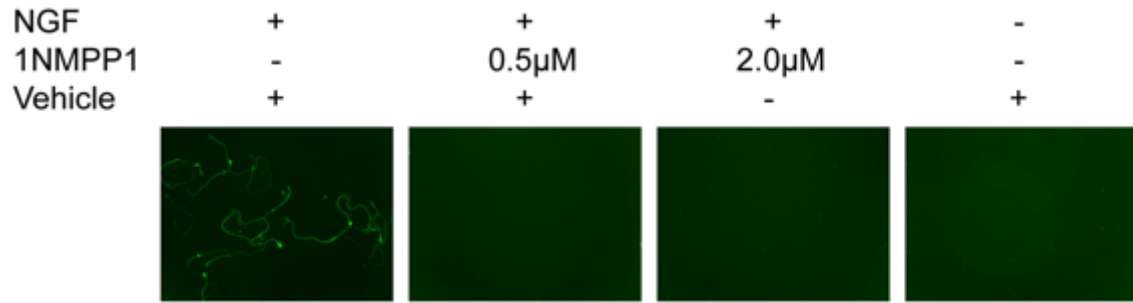

**Supplementary Figure S2. Validation of 1NMPP1 inhibition of NGF mediated DRG derived dendrite growth *in vitro*.** Dissociated DRG neuron cultures were established from TrkA<sup>F592A</sup> animals (e13.5) and cultured for 96 h with 1NMPP1 (0.5 or 2  $\mu$ M) or vehicle control (DMSO with PBST (0.25% Tween20 in PBS)) with or without recombinant Nerve growth factor (NGF, 50 ng/mL). Immunofluorescent staining for neurofilament demonstrates dendrite growth with NGF, which is completely inhibited by the presence of 1NMPP1. Experiment was performed in a single replicate.

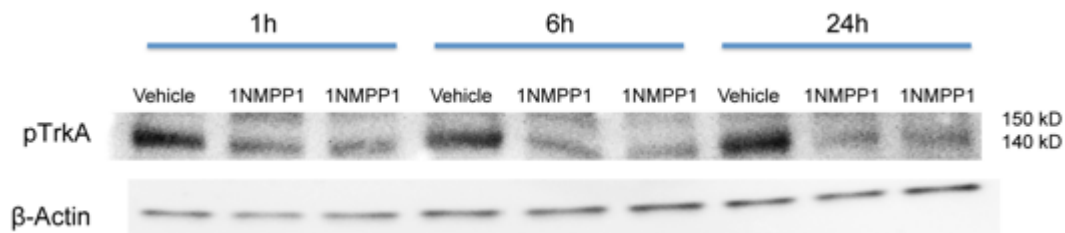

**Supplementary Figure S3. Validation of 1NMPP1 inhibition of TrkA phosphorylation**

**within the dorsal root ganglia (DRG) *in vivo*.** The small molecule 1NMPP1 (17  $\mu\text{g/g}$  BW IP) or vehicle control (50% DMSO and 50% PBST (0.25% Tween20 in PBS)), was administered to  $\text{TrkA}^{\text{F592A}};$ Thy1-YFP animals (male, 15 week old). Bilateral DRG were pooled (L2-L5) from each animal and protein was immediately isolated for analysis of phospho-TrkA by Western blot. Each lane represents pooled lumbar DRGs from a single animal. Experiment was performed in two replicates.

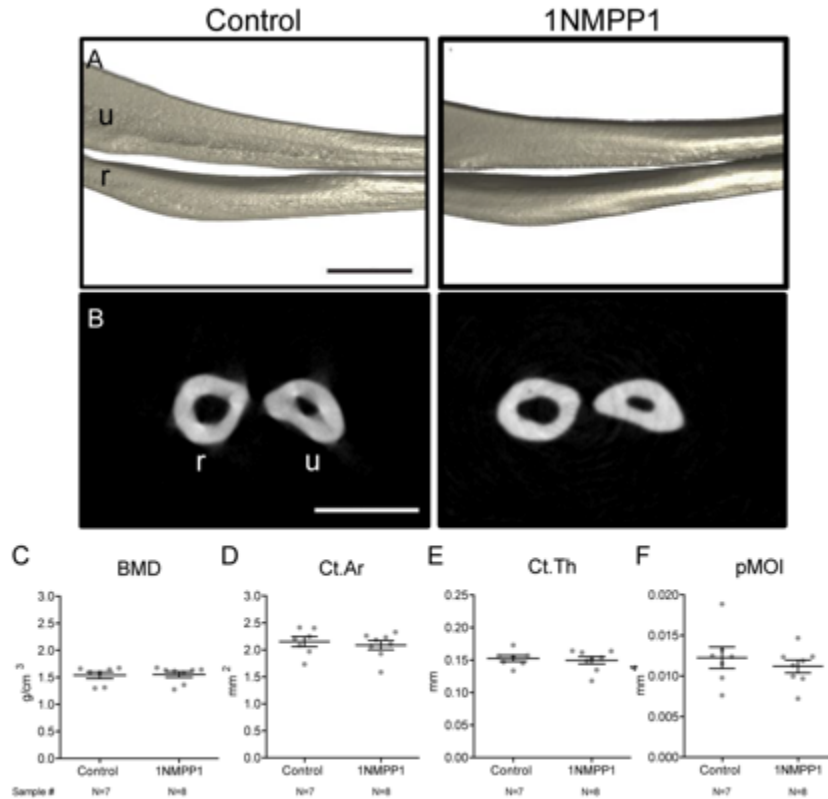

**Supplementary Figure S4. Lack of cortical bone phenotype in uninjured forelimbs of 1NMPP1-treated TrkA 592A animals.** Analysis of uninjured forelimbs among TrkA<sup>F592A</sup>;Thy1-YFP mice treated with 1NMPP1 or vehicle control for 7 d. **(A,B)**  $\mu$ CT images of mid-diaphysis of uninjured forelimb of TrkA<sup>F592A</sup>;Thy1-YFP mice treated with 1NMPP1 or vehicle control, including **(A)** three dimensional  $\mu$ CT reconstruction and **(B)** axial cross-sectional images. **(C-F)** Quantitative  $\mu$ CT analysis of the ulnar mid-diaphysis among TrkA<sup>F592A</sup>;Thy1-YFP mice treated with 1NMPP1 or vehicle control, including **(C)** Bone Mineral Density (BMD), **(D)** Cortical Area (Ct.Ar), **(E)** Cortical Thickness (Ct.Th), and **(F)** polar Moment of Inertia (pMOI). For all graphs, each dot represents a single sample, with each sample number stated below. Black scale bar: 500  $\mu$ m; white scale bar: 1mm. u: ulna; r: radius. No statistically significant differences as determined using a two-way Student's *t*-test.

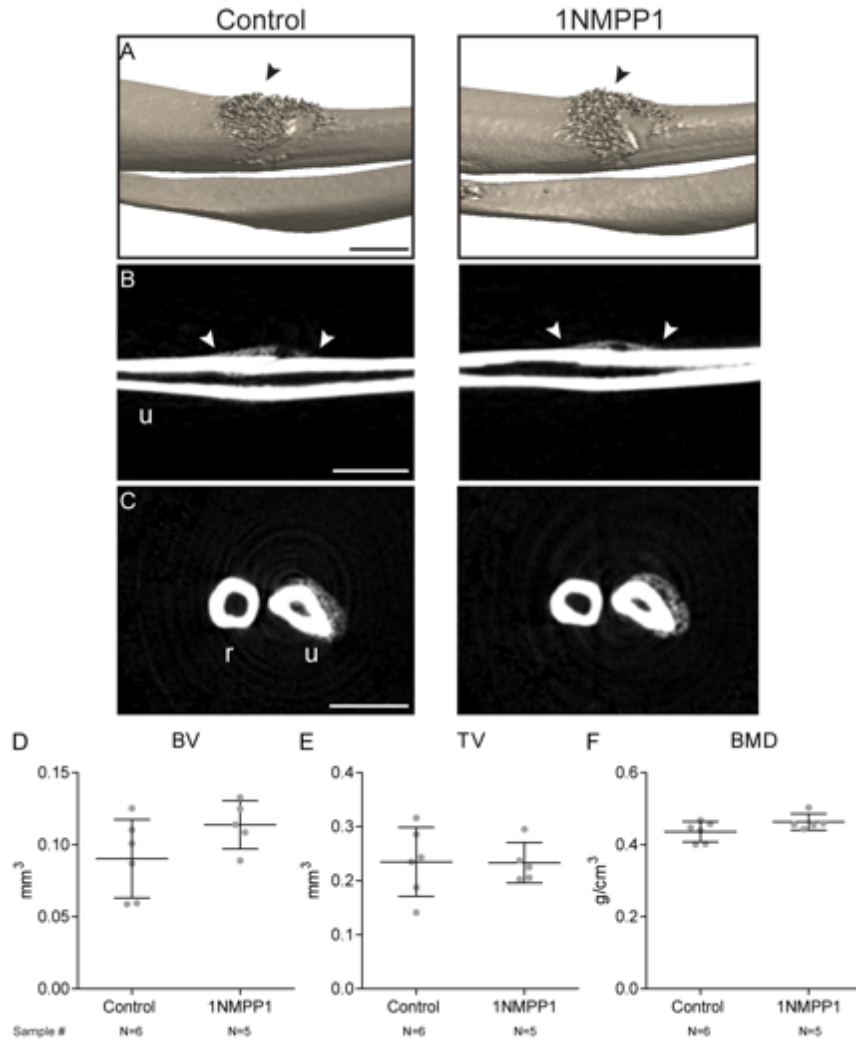

**Supplementary Figure S5. Lack of stress fracture phenotype in 1NMPP1-treated wildtype animals.** (A-C)  $\mu$ CT images of ulnar stress fracture healing among C57BL/6J mice treated with 1NMPP1 or vehicle control at d7 post-injury. (A)  $\mu$ CT reconstructions, (B) coronal cross sectional images, and (C) axial cross sectional images are shown. u: ulna; r: radius. (D-F) Quantitative  $\mu$ CT analysis of the ulnar stress fracture after 7d among C57BL/6J mice treated with 1NMPP1 or vehicle control, including (D) Bone Volume (BV), (E) Tissue Volume (TV), and (F) Bone Mineral Density (BMD). For all graphs, each dot represents a single sample, with each sample number stated below. Black scale bar: 500  $\mu$ m; white scale bar: 1mm. u: ulna; r: radius. No statistically significant differences as determined using a two-way Student's *t*-test.

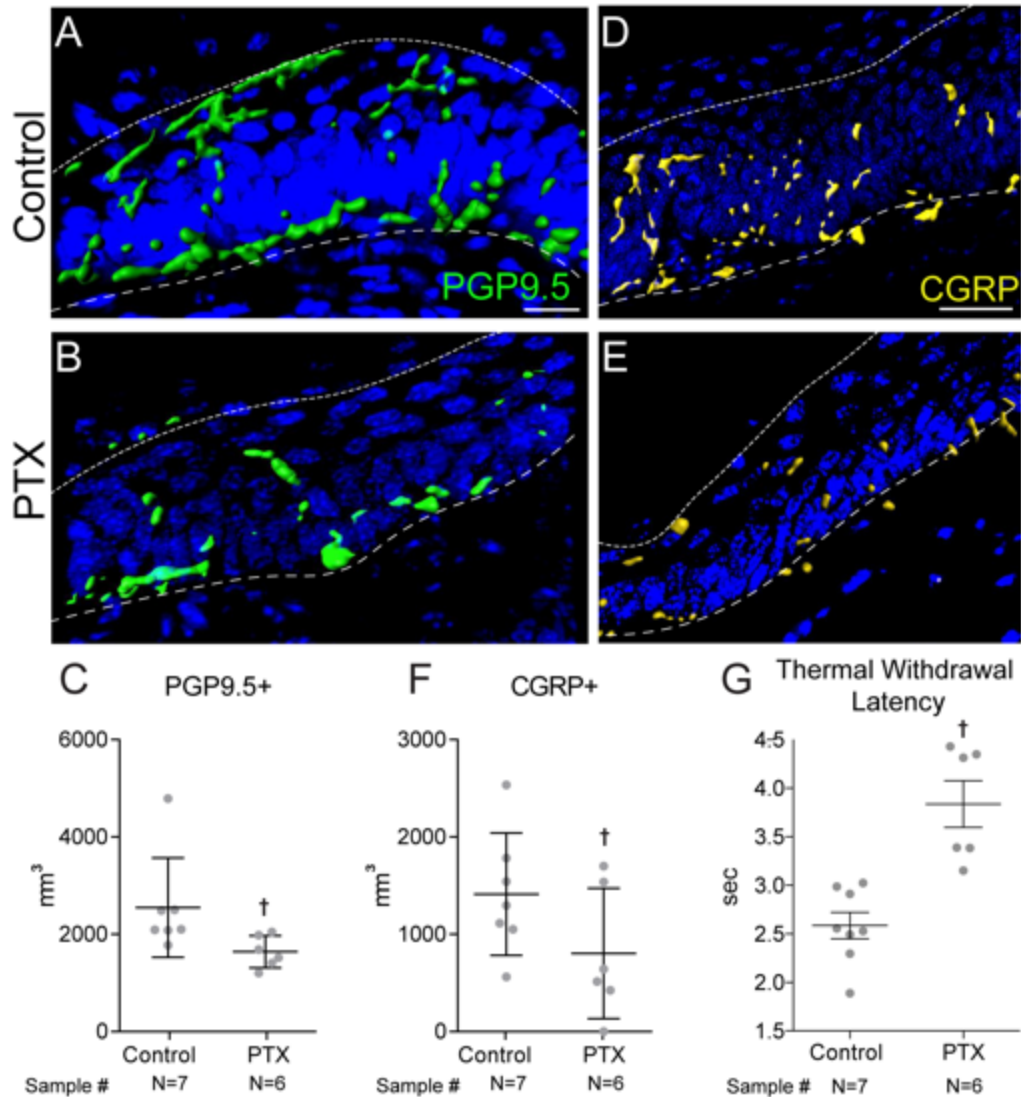

**Supplementary Figure S6. Paclitaxel (PTX) induces a peripheral sensory neuropathy.** (A-C) Intra-epidermal nerve fiber loss among PTX-treated animals in comparison to control, including (A,B) representative pan-neuronal PGP9.5 immunohistochemical staining, appearing green, and (C) quantification of PGP9.5<sup>+</sup> nerve fiber frequency. (D-F) Peptidergic intra-epidermal nerve fiber loss among PTX-treated animals, including (D,E) representative Calcitonin gene-related peptide (CGRP) immunohistochemical staining, appearing yellow, and (F) quantification of CGRP<sup>+</sup> nerve fiber frequency. (G) Thermal withdrawal latency among control- or PTX-treated animals. Immunofluorescent images are presented as Imaris surface renderings. For all graphs, each dot represents a single sample, with sample numbers stated below. †  $P < 0.05$  in comparison to control as determined using a two-way Student's *t*-test. White scale bar: 20  $\mu$ m.

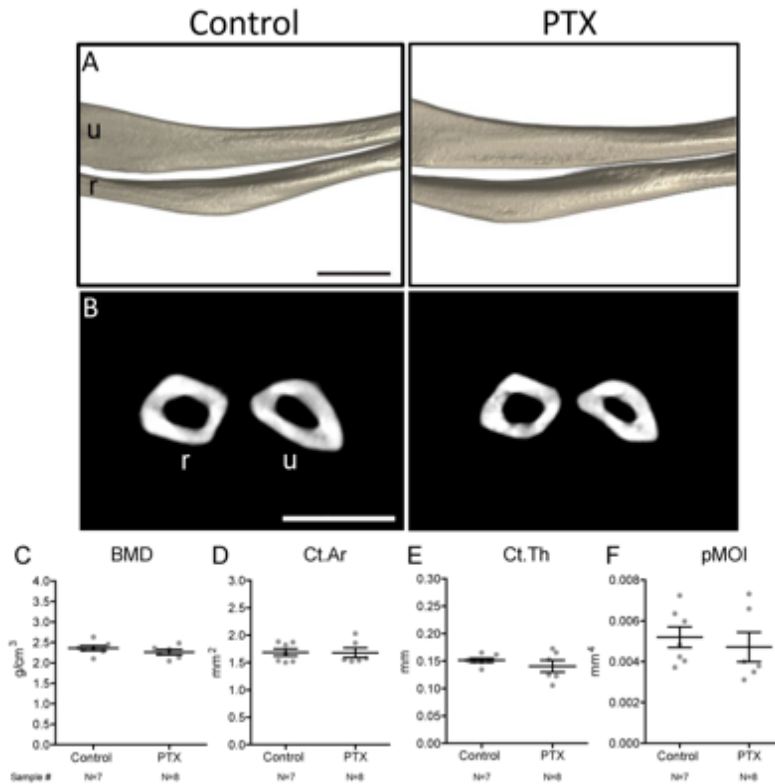

**Supplementary Figure S7. Lack of cortical bone phenotype in uninjured forelimbs of mice with Paclitaxel (PTX)-induced sensory neuropathy.** Analysis of uninjured forelimbs of PTX- or control-treated mice. Analysis performed at the study endpoint using uninjured, contralateral limbs. **(A,B)**  $\mu$ CT images of mid-diaphysis of uninjured forelimb, including **(A)** three dimensional reconstruction and **(B)** axial cross-sectional images. **(C-F)** Quantitative  $\mu$ CT analysis of the ulnar mid-diaphysis among PTX- and control-treated mice, including **(C)** Bone Mineral Density (BMD), **(D)** Cortical Area (Ct.Ar), **(E)** Cortical Thickness (Ct.Th), and **(F)** polar Moment of Inertia (pMOI). For all graphs, each dot represents a single sample, with each sample number stated below. Black scale bar: 500  $\mu$ m; white scale bar: 1mm. u: ulna; r: radius. No statistically significant differences as determined using a two-way Student's *t*-test.

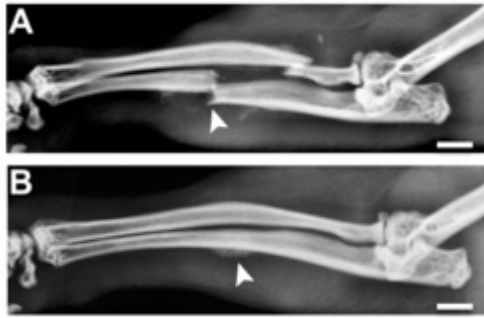

**Supplementary Figure S8. Method of screening for displaced fractures.** High resolution roentgenography (XR, Faxitron Bioptics, LLC, Tucson, AZ) assessed for either a displaced ulnar fracture and/or combined radial/ulnar fracture which occurred in a small minority of cases. These were discarded without analysis. **(A)** Displaced and combined radial/ulnar fracture (day 7 post injury shown). **(B)** For comparison, normal XR appearance of ulnar stress fracture at day 7 post injury, with intact bone and a localized callus most prominent on the ulnar aspect of the mid-diaphysis.



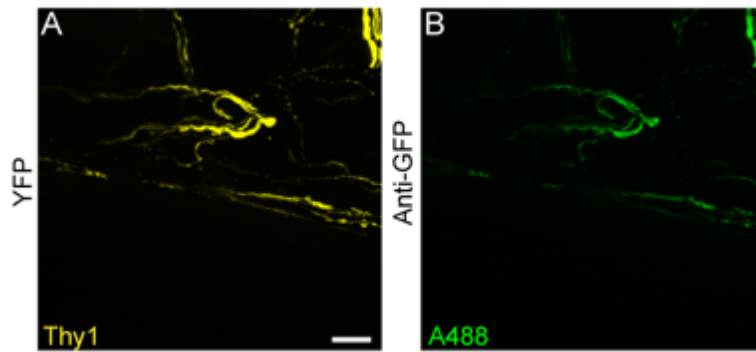

**Supplementary Figure S9. Validation of Thy1-YFP reporter activity without antibody detection.** No antibody detection was required to visualize fine nerve fibers using the Thy1-YFP reporter animal. Incubation was performed with anti-GFP antibody on Thy1-YFP reporter sections (day 14 fracture callus), followed by confocal microscopy and spectral unmixing to detect endogenous YFP reporter activity (**A**) or the exogenous fluorophore (Alexa Fluor 488) (**B**). No difference in nerve frequency or distribution was seen. Representative images are shown, representing triplicate experimental replicates. White scale bar: 50  $\mu$ m.

**Supplementary Table S1. Mouse lines used.**

---

|                       |                                                                  |
|-----------------------|------------------------------------------------------------------|
| C57BL/6J              | Jackson Laboratory, Stock #000664                                |
| NGF-eGFP              | Donated from Kawaja laboratory                                   |
| Thy1-YFP              | Jackson Laboratory, Stock #003709                                |
| TrkA-LacZ             | Jackson Laboratory, Stock #004837                                |
| TrkA <sup>F592A</sup> | Donated from Ginty laboratory, Jackson Laboratory, Stock #022362 |

**Supplementary Table S2: Loading parameters by strain**

| <b>Genotype</b>                 | <b>Gender</b><br>(M/F) | <b>Age</b><br>(wks) | <b>Ultimate Force</b><br>( $\pm$ SD) (N) | <b>Displacement</b><br><b>Constant</b> ( $\pm$ SD) (mm) |
|---------------------------------|------------------------|---------------------|------------------------------------------|---------------------------------------------------------|
| C57BL/6J                        | M                      | 18                  | -4.598 ( $\pm$ 0.231)                    | -0.909 ( $\pm$ 0.249)                                   |
| NGF-eGFP                        | M                      | 18                  | -4.616 ( $\pm$ 0.325)                    | -0.945 ( $\pm$ 0.333)                                   |
| Thy1-YFP                        | M                      | 18                  | -4.392 ( $\pm$ 0.811)                    | -0.820 ( $\pm$ 0.149)                                   |
| TrkA-LacZ                       | M                      | 18                  | -4.374 ( $\pm$ 0.526)                    | -0.867 ( $\pm$ 0.102)                                   |
| TrkA <sup>F592A</sup> ;Thy1-YFP | M                      | 18                  | -4.392 ( $\pm$ 0.391)                    | -0.738 ( $\pm$ 0.053)                                   |

**Supplementary Table S3: Antibodies used.**

| <b>Name</b>          | <b>Vendor</b>  | <b>Catalog No.</b> | <b>Concentration</b> |    |
|----------------------|----------------|--------------------|----------------------|----|
| Anti- $\beta$ -actin | Cell Signaling | 3700S              | 1:2000               | WB |
| Anti-CD31            | Abcam          | ab28364            | 1:100                | IF |
| Anti-CD45            | BioLegend      | 103144             | 1:200                | IF |
| Anti-CD68            | Abcam          | ab955              | 1:200                | IF |
| Anti-CD117           | LSBio          | C177669            | 1:200                | IF |
| Anti-CGRP            | Sigma Aldrich  | C8198              | 1:200                | IF |
| Anti-F4/80           | Abcam          | ab204467           | 1:200                | IF |
| Anti-GFP             | Invitrogen     | A21311             | 1:200                | IF |
| Anti-Ly-6G           | BioLegend      | 127636             | 1:200                | IF |
| Anti-Neurofilament   | ThermoFisher   | MA1-10041          | 1:1000               | IF |
| Anti-Osteocalcin     | Abcam          | ab93876            | 1:200                | IF |
| Anti-PDGFR $\alpha$  | Abcam          | ab15501            | 1:200                | IF |
| Anti-PDGFR $\beta$   | Abcam          | ab32570            | 1:200                | IF |
| Anti-PGP 9.5         | Biorad         | 7863-0504          | 1:200                | IF |
| Anti-TH              | EMD Millipore  | AB152              | 1:200                | IF |
| Anti-TRAP            | Abcam          | ab212723           | 1:500                | IF |
| Anti-pTrkA           | Cell Signaling | 4619               | 1:1000               | WB |
| Anti-TUBB3           | Abcam          | ab18207            | 1:1500               | IF |
| Anti-Vimentin        | Abcam          | ab194719           | 1:200                | IF |
| Goat Anti-Mouse IgG  | Abcam          | ab150119           | 1:200                | IF |
| Goat Anti-Rabbit IgG | Vector         | DI-1594            | 1:200                | IF |
